# Supplementary material for: Influence of depression on racial and ethnic disparities in diabetes control
Source: HighWire-hosted journal article supplement (doi:10.1136/bmjdrc-2023-003612), 2023-11-01
Supplement: bmjdrc-2023-003612supp001_data_supplement.pdf [file bmjdrc-2023-003612supp001_data_supplement.pdf]

## Supplemental Material

### Exhibit S1. ICD9 and ICD10 codes used to define a diabetes diagnosis

#### ICD9CM

357.2, 250.00, 250.01, 250.02, 250.03, 250.10, 250.11, 250.12, 250.13, 250.20, 250.21, 250.22, 250.23, 250.30, 250.31, 250.32, 250.33, 250.40, 250.41, 250.42, 250.43, 250.50, 250.51, 250.52, 250.53, 250.60, 250.61, 250.62, 250.63, 250.70, 250.71, 250.72, 250.73, 250.80, 250.81, 250.82, 250.83, 250.90, 250.91, 250.92, 250.93, 362.01, 362.02, 362.03, 362.04, 362.05, 362.06, 362.07, 366.41, 648.00, 648.01, 648.02, 648.03, 648.04

#### ICD10CM

E10.8, E10.9, E11.8, E11.9, E13.8, E13.9, E10.10, E10.11, E10.21, E10.22, E10.29, E10.36, E10.39, E10.40, E10.41, E10.42, E10.43, E10.44, E10.49, E10.51, E10.52, E10.59, E10.65, E10.69, E11.00, E11.01, E11.21, E11.22, E11.29, E11.36, E11.39, E11.40, E11.41, E11.42, E11.43, E11.44, E11.49, E11.51, E11.52, E11.59, E11.65, E11.69, E13.00, E13.01, E13.10, E13.11, E13.21, E13.22, E13.29, E13.36, E13.39, E13.40, E13.41, E13.42, E13.43, E13.44, E13.49, E13.51, E13.52, E13.59, E13.65, E13.69, O24.02, O24.03, O24.12, O24.13, O24.32, O24.33, O24.82, O24.83, E10.311, E10.319, E10.321, E10.329, E10.331, E10.339, E10.341, E10.349, E10.351, E10.359, E10.610, E10.618, E10.620, E10.621, E10.622, E10.628, E10.630, E10.638, E10.641, E10.649, E11.311, E11.319, E11.321, E11.329, E11.331, E11.339, E11.341, E11.349, E11.351, E11.359, E11.610, E11.618, E11.620, E11.621, E11.622, E11.628, E11.630, E11.638, E11.641, E11.649, E13.311, E13.319, E13.321, E13.329, E13.331, E13.339, E13.341, E13.349, E13.351, E13.359, E13.610, E13.618, E13.620, E13.621, E13.622, E13.628, E13.630, E13.638, E13.641, E13.649, O24.011, O24.012, O24.013, O24.019, O24.111, O24.112, O24.113, O24.119, O24.311, O24.312, O24.313, O24.319, O24.811, O24.812, O24.813, O24.819

**Exhibit S2. Diabetes-related prescriptions**

*Note: list does not include metformin alone as it can be used to treat other conditions*

- acarbose
- albiglutide
- alogliptin
- alogliptin-metFORMIN
- alogliptin-pioglitazone
- canagliflozin
- canagliflozin-metFORMIN
- chlorproPAMIDE
- dapagliflozin
- empagliflozin
- empagliflozin-metformin
- empagliflozin-linagliptin
- exenatide
- glimepiride
- glimepiride-pioglitazone
- glimepiride-rosiglitazone
- glipiZIDE
- glipiZIDE-metFORMIN
- glyBURIDE
- glyBURIDE-metFORMIN
- insulin
- linagliptin
- linagliptin-metFORMIN
- liraglutide
- metFORMIN-pioglitazone
- metFORMIN-repaglinide
- metFORMIN-rosiglitazone
- metFORMIN-saxagliptin
- metFORMIN-sitaGLIPtin
- miglitol
- nateglinide
- pioglitazone
- pramlintide
- repaglinide
- rosiglitazone
- saxagliptin
- sitaGLIPtin
- TOLAZamide
- TOLBUTamide

**Exhibit S3. Antidepressant medications**

Bupropion, Vilazodone, Vortioetine, Isocarboxazid, Selegiline, Phenelzine, Tranylcypromine, Nefazodone, Trazodone, Amitriptyline-chlordiazepoxide, Amitriptyline-perphenazine, Fluoxetine-olanzapine, Desvenlafaxine, Levomilnacipran, Venlafaxine, Duloxetine, Citalopram, Fluoxetine, Paroxetine, Escitalopram, Fluvoxamine, Sertraline, Maprotiline, Mirtazapine, Amitriptyline, Desipramine, Nortriptyline, Amoxapine, Doxepin (gt 6mg), Protriptyline, Clomipramine, Imipramine, Trimipramine
